# Supplementary material for: A 69 kb Deletion in chr19q13.42 including PRPF31 Gene in a Chinese Family Affected with Autosomal Dominant Retinitis Pigmentosa
Source: MDPI journal article supplement (doi:10.3390/jcm11226682), 2022-11-11
Supplement: s1 [file s1]

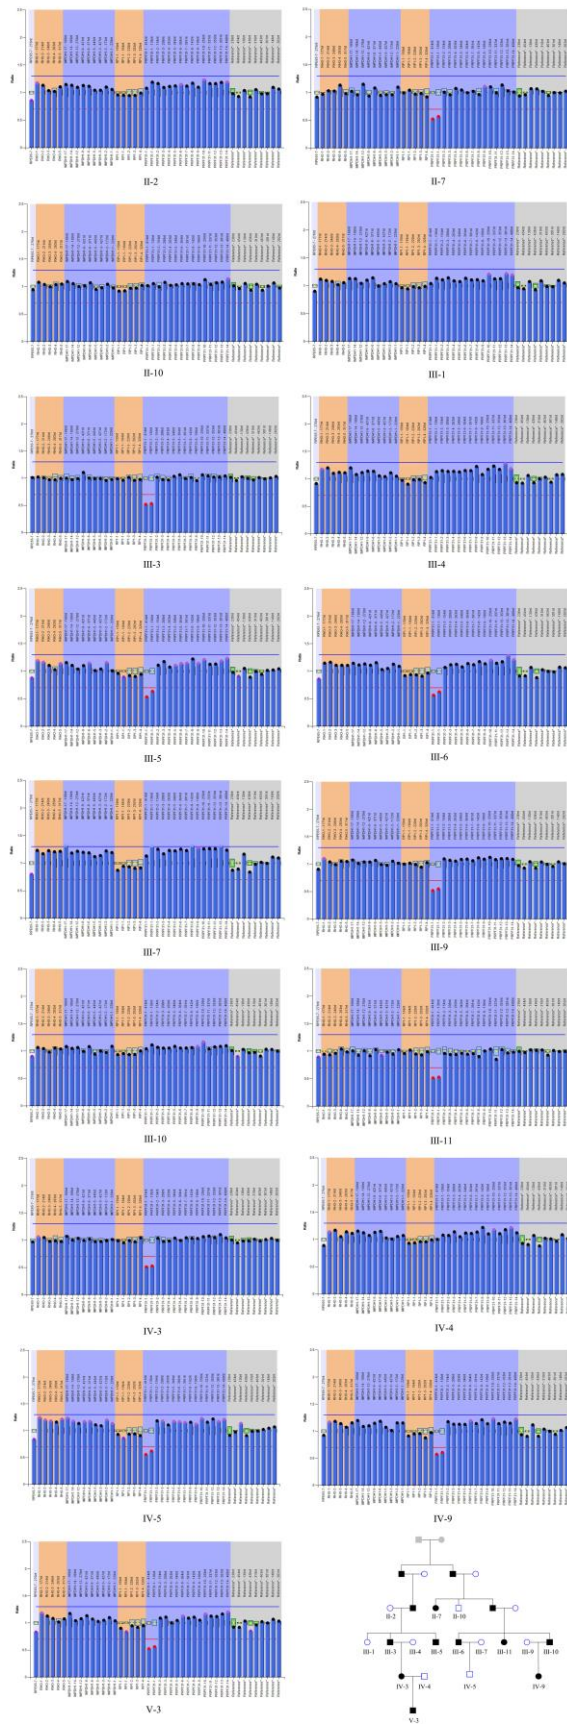

**Figure S1.** The results of multiplex ligation-dependent probe amplification (MLPA).

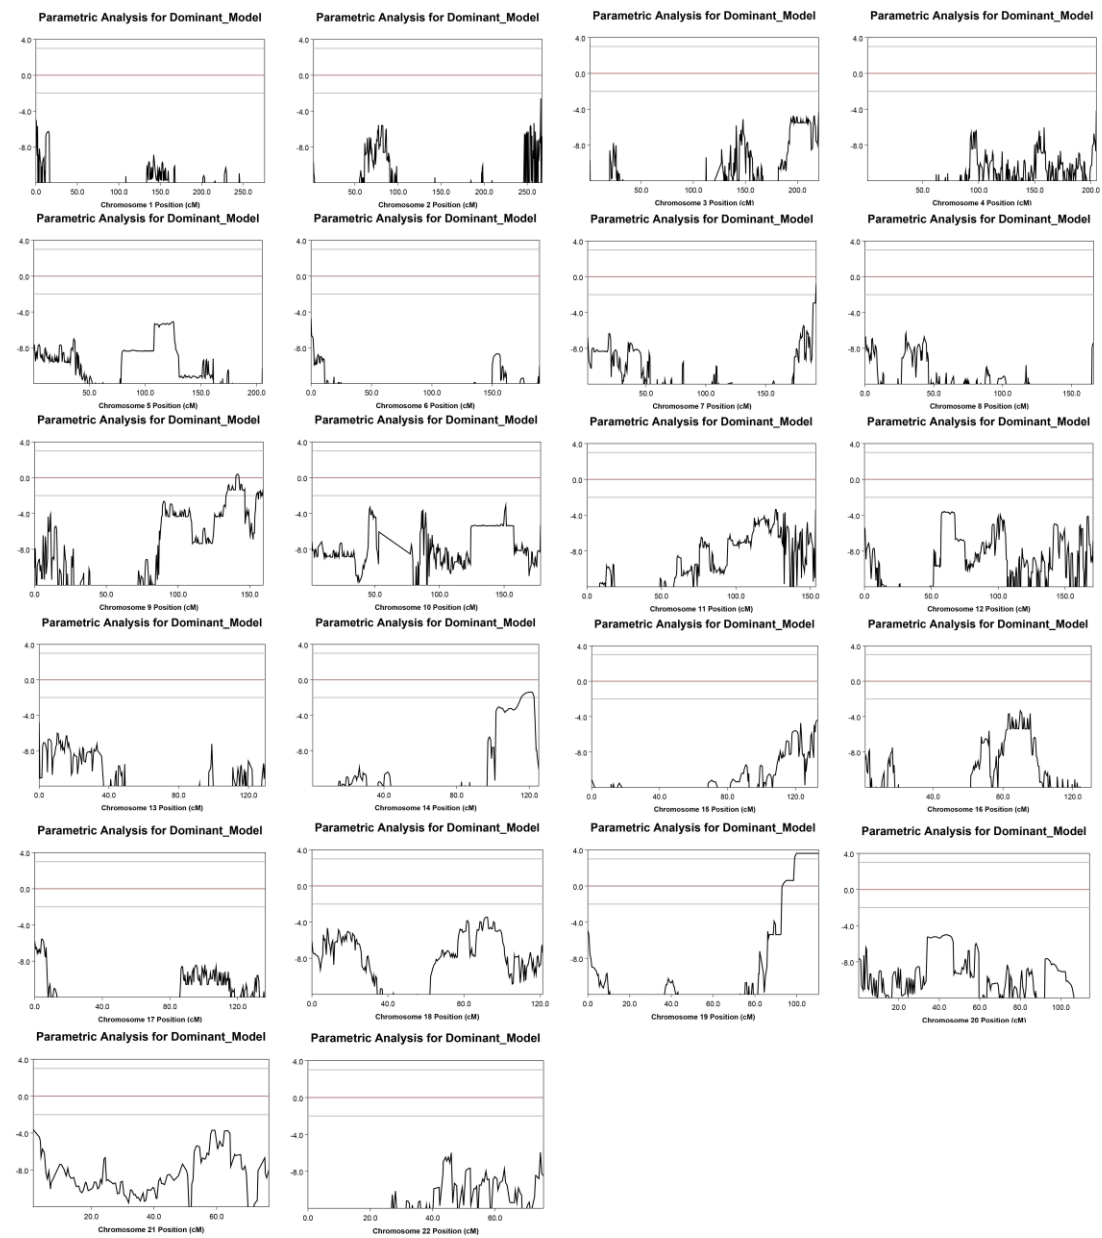

Figure S2. The parametric analysis of autosomal 1-22.

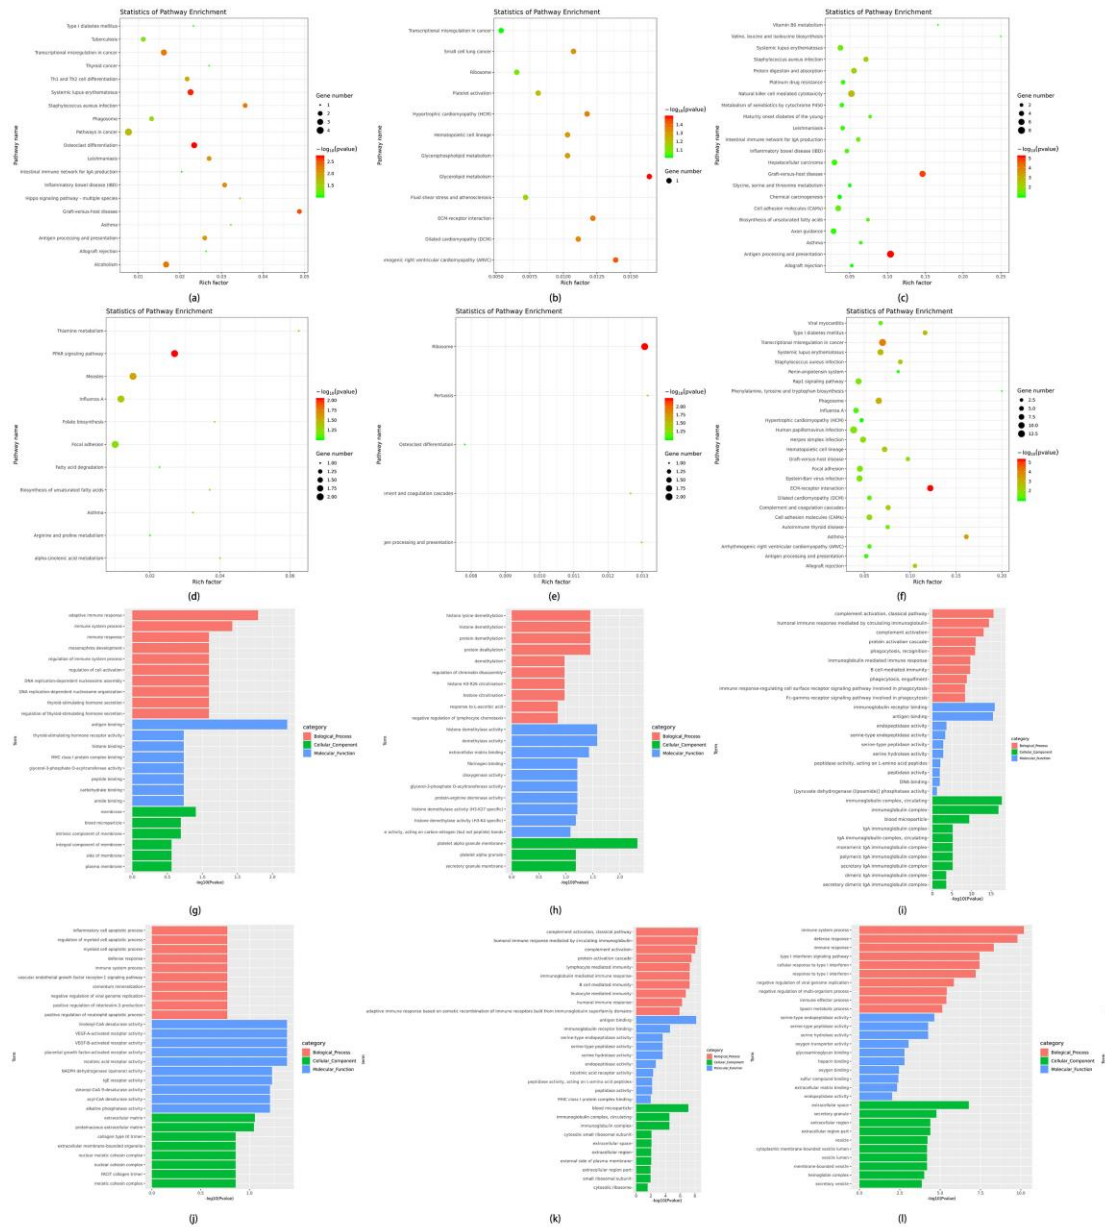

**Figure S3.** Gene ontology (GO) term and Kyoto encyclopedia of genes and genomes (KEGG) function enrichment of differential expressive genes (DEGs) analysis. (a-c) and (g-i) represent the up-regulated gene and (d-f) and (j-l) represent the down-regulated genes. The left is the III-7 vs III-6, the middle is IV-5+IV-7 vs III-7 and the right row is IV-5+IV-7 vs III-6.

**Table S1.** Panel of next generation sequencing for fundus diseases

| Genes list |         |           |        |          |          |          |         |
|------------|---------|-----------|--------|----------|----------|----------|---------|
| RGS9BP     | B3GLCT  | PANK2     | NPHP3  | VPS13B   | CLDN19   | RPIA     | LRPPRC  |
| ALG2       | SBF2    | COL18A1   | SOST   | NDUFS7   | FKRP     | TEAD1    | SALL4   |
| EIF2B3     | TMCO1   | HMX1      | PEX26  | CHD7     | AHI1     | ZNF644   | TMEM216 |
| AAAS       | EIF2B4  | SACS      | EIF2B2 | OSTM1    | POMT1    | NDUFV1   | SOX10   |
| PHYH       | TCIRG1  | ALG3      | EPM2A  | HCCS     | SLC12A6  | CTNS     | KRIT1   |
| LARGE1     | SLC24A1 | NDUFS3    | LRP2   | HSD17B10 | GPC3     | COX15    | BCS1L   |
| ATIC       | ACOX1   | PAX2      | EIF2B5 | HESX1    | RGS9     | PDHX     | SURF1   |
| SH3BP2     | PRPS1   | TNFRSF11B | NDUFS8 | NDUFS4   | LAMB2    | ERBB3    | OPN1SW  |
| IGBP1      | EIF2B1  | CLCN7     | PRSS56 | CISD2    | TRIM37   | PTGS1    | GABRB3  |
| CYP27A1    | TSC2    | PLP1      | ARSA   | APOC2    | PEX1     | NOTCH3   | NEU1    |
| ALDH3A2    | TSC1    | ATXN7     | ATXN1  | PEX2     | PTEN     | PMM2     | PLOD1   |
| PEX7       | PEX6    | PEX12     | NAGA   | MTTP     | MITF     | JAG1     | IDS     |
| HSD11B2    | SHH     | HADHA     | GP1BA  | GALC     | G6PC     | FGFR2    | CP      |
| ERCC8      | LYST    | ASPA      | TIMM8A | CAPN5    | IMPG1    | RCBTB1   | EPHA2   |
| ARHGEF18   | REEP6   | AGBL5     | HGSNAT | IFT172   | CCDC28B  | NEK2     | IFT74   |
| IFT27      | POC1B   | SLC19A2   | NBAS   | MFF      | SLC25A46 | ACO2     | MECR    |
| TBCE       | UCHL1   | RTN4IP1   | PMPCA  | ISCA2    | ATP1A3   | YME1L1   | KLC2    |
| CTNNB1     | COL4A4  | COL4A3    | WDPCP  | FLVCR1   | CYP4V2   | RP9      | CERKL   |
| CRB1       | EYS     | RD3       | LCA5   | RP1L1    | USH1G    | CACNA2D4 | OTX2    |
| BBS12      | RDH12   | BBS5      | CABP4  | ZNF513   | TTC8     | KCNV2    | COL9A1  |
| CDHR1      | PCDH15  | BBS4      | RAX2   | TMEM126A | ARL6     | HMCN1    | BBS2    |
| MFRP       | PITPNM3 | OPA3      | CEP290 | BBS10    | BBS1     | ELOVL4   | NYX     |
| SEMA4A     | CDH23   | RPGRIP1   | CNNM4  | OPN1LW   | INPP5E   | CNGB3    | TMX3    |
| MKKS       | SPATA7  | BBS7      | CLN6   | POMGNT1  | C1QTNF5  | PRPF31   | OPA1    |
| RPGRIP1L   | ALMS1   | NPHP4     | RIMS1  | AIPL1    | NR2E3    | SNRNP200 | POMT2   |
| PRPF6      | FSCN2   | RAB3GAP1  | FZD4   | USH2A    | RP2      | IDH3B    | RBP4    |
| SDCCAG8    | CLN5    | PRPF8     | MERTK  | FBLN5    | RP1      | PDE6C    | NTF4    |
| NRL        | PROM1   | WFS1      | TOPORS | TSPAN12  | USH1C    | GNAT2    | CACNA1F |
| UNC119     | LRAT    | PRPF3     | VCAN   | SDHA     | EFEMP1   | ADAM9    | IKBKKG  |
| TULP1      | SPG7    | SOX2      | GRK1   | RGR      | RDH5     | RBP3     | PDE6G   |

|           |          |            |          |          |           |          |           |
|-----------|----------|------------|----------|----------|-----------|----------|-----------|
| TRPM1     | GUCA1B   | COL11A1    | COL2A1   | CDH3     | CNGA3     | CNGB1    | DHDDS     |
| MAK       | KCNJ13   | TRIM32     | CC2D2A   | PRCD     | BBS9      | KLHL7    | C2orf71   |
| IQCB1     | OPTN     | IMPDH1     | GRM6     | CA4      | CRX       | VHL      | SAG       |
| RHO       | HEXB     | HEXA       | OPN1MW   | PDE6A    | LTBP2     | GUCA1A   | CHM       |
| TYR       | TTPA     | TIMP3      | ABCA4    | RPE65    | RPGR      | ROM1     | RLBP1     |
| PRPH2     | RB1      | PPT1       | PDE6B    | PAX6     | OAT       | GPR143   | NPHP1     |
| NDP       | MYOC     | MYO7A      | GUCY2D   | GNAT1    | FBN1      | CYP1B1   | CNGA1     |
| CLN3      | OFD1     | FAM161A    | BEST1    | IMPG2    | CLRN1     | C8orf37  | SLC7A14   |
| KIZ       | PRPF4    | ZNF408     | ARL2BP   | ITM2B    | MFSD8     | RAB28    | TTLL5     |
| PCYT1A    | PDE6H    | RS1        | GPR179   | LRIT3    | CFI       | SIX6     | NMNAT1    |
| GDF6      | FKTN     | GMPPB      | SLC45A2  | TYRP1    | OCA2      | SLC24A5  | LRP5      |
| ASB10     | WDR36    | FOXC1      | POLG     | SLC25A4  | TWNK      | POLG2    | RRM2B     |
| SALL2     | SCO2     | PRIMPOL    | SLITRK6  | RAX      | ALDH1A3   | STRA6    | ABCB6     |
| SMOC1     | FRMD7    | ABHD12     | ADAMTS18 | ADAMTSL4 | COL11A2   | ADGRV1   | CIB2      |
| PDZD7     | MKS1     | TMEM67     | LZTFL1   | BBIP1    | CASK      | NR2F1    | OCRL      |
| TGFBR1    | TGFBR2   | TPP1       | DNAJC5   | CLN8     | CTSD      | ATM      | MRE11     |
| C12orf65  | CACNA1A  | PRKCG      | HGF      | LOXHD1   | DNM1L     | FAM126A  | MFN2      |
| MPDZ      | RAD51    | SCN2A      | SLC9A6   | SOD1     | TK2       | TTC21B   | C5AR2     |
| NXNL1     | OPTC     | NR2E1      | DOCK9    | OLFM2    | KIF11     | GNPTG    | SRPX      |
| EMC1      | MYO15A   | DHX38      | NEUROD1  | OR2W3    | DRAM2     | APOE     | CFHR1     |
| CFHR3     | CFH      | ERCC6      | HTRA1    | C3       | CST3      | CX3CR1   | C2        |
| C9        | FBN2     | ATF6       | NAA10    | BCOR     | BMP4      | VAX1     | RARB      |
| HMGB3     | MAB21L2  | TENM3      | TMEM98   | HDAC6    | GLI2      | YAP1     | C12orf57  |
| ACTB      | PIGL     | SRD5A3     | TFAP2A   | PITX2    | ELP4      | LRPAP1   | SLC39A5   |
| P3H2      | ANTXR1   | WDR73      | SLC38A8  | TUBA8    | PNPLA6    | RDH11    | TUB       |
| LRMDA     | TUBGCP4  | TUBGCP6    | PLA2G5   | POMGNT2  | TMEM5     | POMK     | CHN1      |
| TREX1     | SLC16A12 | ATOH7      | WHRN     | HARS     | WDR19     | ARL13B   | ATP13A2   |
| CTSF      | KCTD7    | GLB1       | IGFBP7   | CTC1     | ACBD5     | C21orf2  | CEP41     |
| CSPP1     | KIF7     | TCTN1      | TCTN3    | TMEM138  | TMEM231   | TMEM237  | ZNF423    |
| CNTNAP2   | COL4A1   | FOXE3      | LMX1B    | LOXL1    | TBK1      | VSX2     | GDF3      |
| GJA1      | SIX3     | CDKN2B-AS1 | tRNA-His | tRNA-Lys | tRNA-Leu1 | tRNA-Pro | tRNA-Ser1 |
| tRNA-Ser2 | tRNA-Val | tRNA-Trp   | ND4      | ND4L     | COX3      | ATP6     | CYTB      |

ND6

ND5

ND3

ND2

COX1

ND1

---

**Table S2.** The number of mutations in *PRPF31* and related phenotypes.

| Phenotype                  | Missense | Splicing | Small deletions | Small insertions | Small indels | Gross deletions | Gross insertions | Complex rearrangements | Repeat variants | Regulatory |
|----------------------------|----------|----------|-----------------|------------------|--------------|-----------------|------------------|------------------------|-----------------|------------|
|                            | nonsense |          |                 |                  |              |                 | /duplications    |                        |                 |            |
| Retinitis pigmentosa       | 62       | 34       | 56              | 25               | 4            | 20              | 7                | 3                      | 0               | 0          |
| Retinal disease            | 5        | 0        | 1               | 0                | 0            | 0               | 0                | 0                      | 0               | 0          |
| Retinal Dystrophy          | 4        | 2        | 2               | 0                | 0            | 0               | 0                | 0                      | 0               | 0          |
| Retinal Degeneration       | 1        | 1        | 5               | 2                | 0            | 0               | 0                | 0                      | 0               | 0          |
| Leber congenital amaurosis | 1        | 0        | 0               | 0                | 0            | 0               | 0                | 0                      | 0               | 0          |
| Developmental disorder     | 0        | 1        | 0               | 0                | 0            | 0               | 0                | 0                      | 0               | 0          |
| Total                      | 73       | 38       | 64              | 27               | 4            | 20              | 7                | 3                      | 0               | 0          |

**Table S3.** Expression level of genes in deletion region and linkage region

| Gene    | Full_name_of gene                                                                    | Map_location | Type_of_gene   | III-6      | IV-5       | IV-7       | III-7      |
|---------|--------------------------------------------------------------------------------------|--------------|----------------|------------|------------|------------|------------|
| PRPF31  | pre-mRNA processing factor 31                                                        | 19q13.42     | protein-coding | 16.4443719 | 14.9491977 | 15.7021280 | 31.0640029 |
|         |                                                                                      |              | ng             | 2          | 2          | 2          | 3          |
| VSTM1   | V-set and transmembrane domain containing 1                                          | 19q13.42     | protein-coding | 6.54140761 | 1.29307406 | 2.10732323 | 5.40733323 |
|         |                                                                                      |              | ng             | 3          | 5          | 6          | 8          |
| TARM1   | T cell-interacting, activating receptor on myeloid cells 1                           | 19q13.42     | protein-coding | 0.24227435 | 0.09461517 |            |            |
|         |                                                                                      |              | ng             | 6          | 5          | 0          | 0          |
| NDUFA3  | NADH:ubiquinone oxidoreductase subunit A3                                            | 19q13.42     | protein-coding | 9.78182712 | 7.63229082 | 6.52756221 | 14.4758816 |
|         |                                                                                      |              | ng             | 5          | 1          | 9          | 9          |
| OSCAR   | osteoclast associated, immunoglobulin-like receptor                                  | 19q13.42     | protein-coding | 34.6149486 | 13.0568942 | 18.5804231 | 45.3990686 |
|         |                                                                                      |              | ng             | 2          | 1          | 7          | 5          |
| TFPT    | TCF3 fusion partner                                                                  | 19q13.42     | protein-coding | 5.54202589 | 3.87922219 | 3.18668391 | 6.47753460 |
|         |                                                                                      |              | ng             | 4          | 4          | 8          | 8          |
| TNNT1   | troponin T1, slow skeletal type                                                      | 19q13.42     | protein-coding |            |            |            |            |
|         |                                                                                      |              | ng             | 9.964      | 0.978      | 1.362      | 0.929      |
| LILRB3  | leukocyte immunoglobulin like receptor B3                                            | 19q13.42     | protein-coding |            |            |            |            |
|         |                                                                                      |              | ng             | 234.34     | 85.469     | 108.81     | 113.047    |
| LAIR2   | leukocyte associated immunoglobulin like receptor 2                                  | 19q13.42     | protein-coding |            |            |            |            |
|         |                                                                                      |              | ng             | 2.332      | 0.315      | 0.206      | 3.267      |
| LILRP1  | leukocyte immunoglobulin-like receptor pseudogene 1                                  | 19q13.42     | pseudo         | 0.03       | 0.946      | 0.822      | 2.028      |
| RFPL4A  | ret finger protein like 4A                                                           | 19q13.42     | protein-coding |            |            |            |            |
|         |                                                                                      |              | ng             | 0          | 0.757      | 0.668      | 1.577      |
| KIR2DL3 | killer cell immunoglobulin like receptor, two Ig domains and long cytoplasmic tail 3 | 19q13.42     | protein-coding |            |            |            |            |
|         |                                                                                      |              | ng             | 1.121      | 4.163      | 1.619      | 6.055      |
| KIR2DL1 | killer cell immunoglobulin like receptor, two Ig domains and long cytoplasmic tail 1 | 19q13.42     | protein-coding |            |            |            |            |
|         |                                                                                      |              | ng             | 0.03       | 4.731      | 0.642      | 1.493      |



|         |                                                                                              |          |                    |       |       |       |        |
|---------|----------------------------------------------------------------------------------------------|----------|--------------------|-------|-------|-------|--------|
| KIR3DL2 | killer cell immunoglobulin like<br>receptor, three Ig domains and<br>long cytoplasmic tail 2 | 19q13.42 | protein-codi<br>ng | 1.393 | 3.059 | 1.336 | 5.689  |
| CACNG6  | calcium voltage-gated channel<br>auxiliary subunit gamma 6                                   | 19q13.42 | protein-codi<br>ng | 2.574 | 0.442 | 0.899 | 0.591  |
| TMC4    | transmembrane channel like 4                                                                 | 19q13.42 | protein-codi<br>ng | 1.121 | 2.113 | 2.853 | 3.605  |
| KIR3DL1 | killer cell immunoglobulin like<br>receptor, three Ig domains and<br>long cytoplasmic tail 1 | 19q13.42 | protein-codi<br>ng | 0.454 | 4.731 | 0.642 | 1.971  |
| TPM3P9  | tropomyosin 3 pseudogene 9                                                                   | 19q13.42 | pseudo             | 10.69 | 9.083 | 9.226 | 4.591  |
| ZNF761  | zinc finger protein 761                                                                      | 19q13.42 | protein-codi<br>ng | 4.755 | 8.484 | 8.506 | 10.702 |
| ZNF550  | zinc finger protein 550                                                                      | 19q13.42 | protein-codi<br>ng | 4.149 | 8.736 | 8.404 | 9.238  |

---

**Table S4.** Expression level of genes related to pre-mRNA splicing and function of genes in linkage region.

| Gene     | Full_name of gene                                       | Map_location | Type_of_gene   | III-6      | IV-5       | IV-7       | III-7      |
|----------|---------------------------------------------------------|--------------|----------------|------------|------------|------------|------------|
| SNRPD3   | small nuclear ribonucleoprotein D3 polypeptide          | 22q11.23     | protein-coding | 32.0710678 | 32.1060828 | 28.5773590 | 32.3313466 |
|          |                                                         |              | ng             | 8          | 7          | 1          | 5          |
| PHF5A    | PHD finger protein 5A                                   | 22q13.2      | protein-coding | 13.6582168 | 13.2145861 | 13.1065225 | 14.3913921 |
|          |                                                         |              | ng             | 2          | 7          | 7          | 1          |
| PRPF6    | pre-mRNA processing factor 6                            | 20q13.33     | protein-coding | 78.0729112 | 74.4621430 | 74.9641692 | 68.3520717 |
|          |                                                         |              | ng             | 4          | 9          | 7          | 2          |
| SF3A2    | splicing factor 3a subunit 2                            | 19p13.3      | protein-coding | 53.7243384 | 46.8660502 | 45.8985280 | 43.4839714 |
|          |                                                         |              | ng             | 5          | 5          | 5          | 6          |
| PRPF3    | pre-mRNA processing factor 3                            | 1q21.2       | protein-coding | 41.7317578 | 45.0683619 | 42.6861450 | 43.2868291 |
|          |                                                         |              | ng             | 3          | 1          | 6          |            |
| LSM8     | LSM8 homolog, U6 small nuclear RNA associated           | 7q31.31      | protein-coding | 10.4480816 | 13.9399691 | 15.9334195 | 15.1517983 |
|          |                                                         |              | ng             |            | 8          | 9          | 4          |
| SNRPA1   | small nuclear ribonucleoprotein polypeptide A'          | 15q26.3      | protein-coding | 15.0210100 | 15.2330432 | 14.7769617 | 15.9966941 |
|          |                                                         |              | ng             | 7          | 5          | 2          | 6          |
| TXNL4A   | thioredoxin like 4A                                     | 18q23        | protein-coding | 26.2867676 | 22.8337956 | 24.6454022 | 24.3893259 |
|          |                                                         |              | ng             | 3          | 8          | 4          | 6          |
| SNRNP200 | small nuclear ribonucleoprotein U5 subunit 200          | 2q11.2       | protein-coding | 204.600693 | 248.869449 | 229.158552 | 226.770037 |
|          |                                                         |              | ng             | 7          | 9          | 4          | 7          |
| SART1    | squamous cell carcinoma antigen recognized by T-cells 1 | 11q13.1      | protein-coding | 86.8856409 | 67.0506210 | 77.2770850 | 66.2679953 |
|          |                                                         |              | ng             | 4          | 1          | 1          | 6          |
| SNU13    | small nuclear ribonucleoprotein 13                      | 22q13.2      | protein-coding | 50.7867618 | 44.5952860 | 42.4548534 | 50.5810963 |
|          |                                                         |              | ng             | 9          | 3          | 9          | 3          |
| SNRNP27  | small nuclear ribonucleoprotein U4/U6.U5 subunit 27     | 2p13.3       | protein-coding | 12.2954235 | 12.7730486 | 13.0551244 | 12.1664997 |
|          |                                                         |              | ng             | 7          | 9          | 4          | 9          |
| PRPF4    | pre-mRNA processing factor 4                            | 9q32         | protein-coding | 17.9283023 | 18.9861118 | 17.6809559 | 17.8273017 |
|          |                                                         |              | ng             | 5          | 8          | 3          | 7          |
| USP39    | ubiquitin specific peptidase 39                         | 2p11.2       | protein-coding | 38.2490639 | 30.1507025 | 37.6234294 | 33.6550167 |
|          |                                                         |              | ng             | 6          | 8          | 8          | 7          |

|        |                                                            |          |                    |            |            |            |            |
|--------|------------------------------------------------------------|----------|--------------------|------------|------------|------------|------------|
| SART1  | squamous cell carcinoma antigen<br>recognized by T-cells 1 | 11q13.1  | protein-codi<br>ng | 86.8856409 | 67.0506210 | 77.2770850 | 66.2679953 |
| GSTM1  | glutathione S-transferase mu 1                             | 1p13.3   | ng                 | 4          | 1          | 1          | 6          |
| ERAP2  | endoplasmic reticulum<br>aminopeptidase 2                  | 5q15     | protein-codi<br>ng | 0          | 7.664      | 9.586      | 7.745      |
| TNNT1  | troponin T1, slow skeletal type                            | 19q13.42 | protein-codi<br>ng | 13.113     | 80.833     | 87.762     | 149.321    |
| SLIT1  | slit guidance ligand 1                                     | 10q24.1  | protein-codi<br>ng | 9.964      | 0.978      | 1.362      | 0.929      |
| MARCKS | myristoylated alanine rich protein<br>kinase C substrate   | 6q21     | protein-codi<br>ng | 1.09       | 0          | 0          | 0          |
| IRF7   | interferon regulatory factor 7                             | 11p15.5  | protein-codi<br>ng | 120.955    | 67.177     | 58.311     | 54.439     |
| GSTM3  | glutathione S-transferase mu 3                             | 1p13.3   | protein-codi<br>ng | 186.309    | 56.012     | 88.019     | 101.247    |
|        |                                                            |          |                    | 1.181      | 5.488      | 3.032      | 6.083      |

---
